# Supplementary material for: Overexpression of Medicago SVP genes causes floral defects and delayed flowering in Arabidopsis but only affects floral development in Medicago
Source: PubMed Central journal article supplement (PMC3904704; doi:10.1093/jxb/ert384), 2013-11-18
Supplement: supp_ert384_jexbot110742_file001.pdf [file supp_ert384_jexbot110742_file001.pdf]

**Overexpression of Medicago *SVP* genes causes floral defects and delayed flowering in Arabidopsis but only affects floral development in Medicago**

*Mauren Jaudal, Jacob Monash, Lulu Zhang, Jiangqi Wen, Kirankumar S. Mysore, Richard Macknight and Joanna Putterill*

**Supplementary Data**

**Fig. S1.** Multiple sequence alignment of SVP-like proteins from different plant species. The deduced amino acid sequences were aligned using ClustalW plugin available in the Geneious software package.

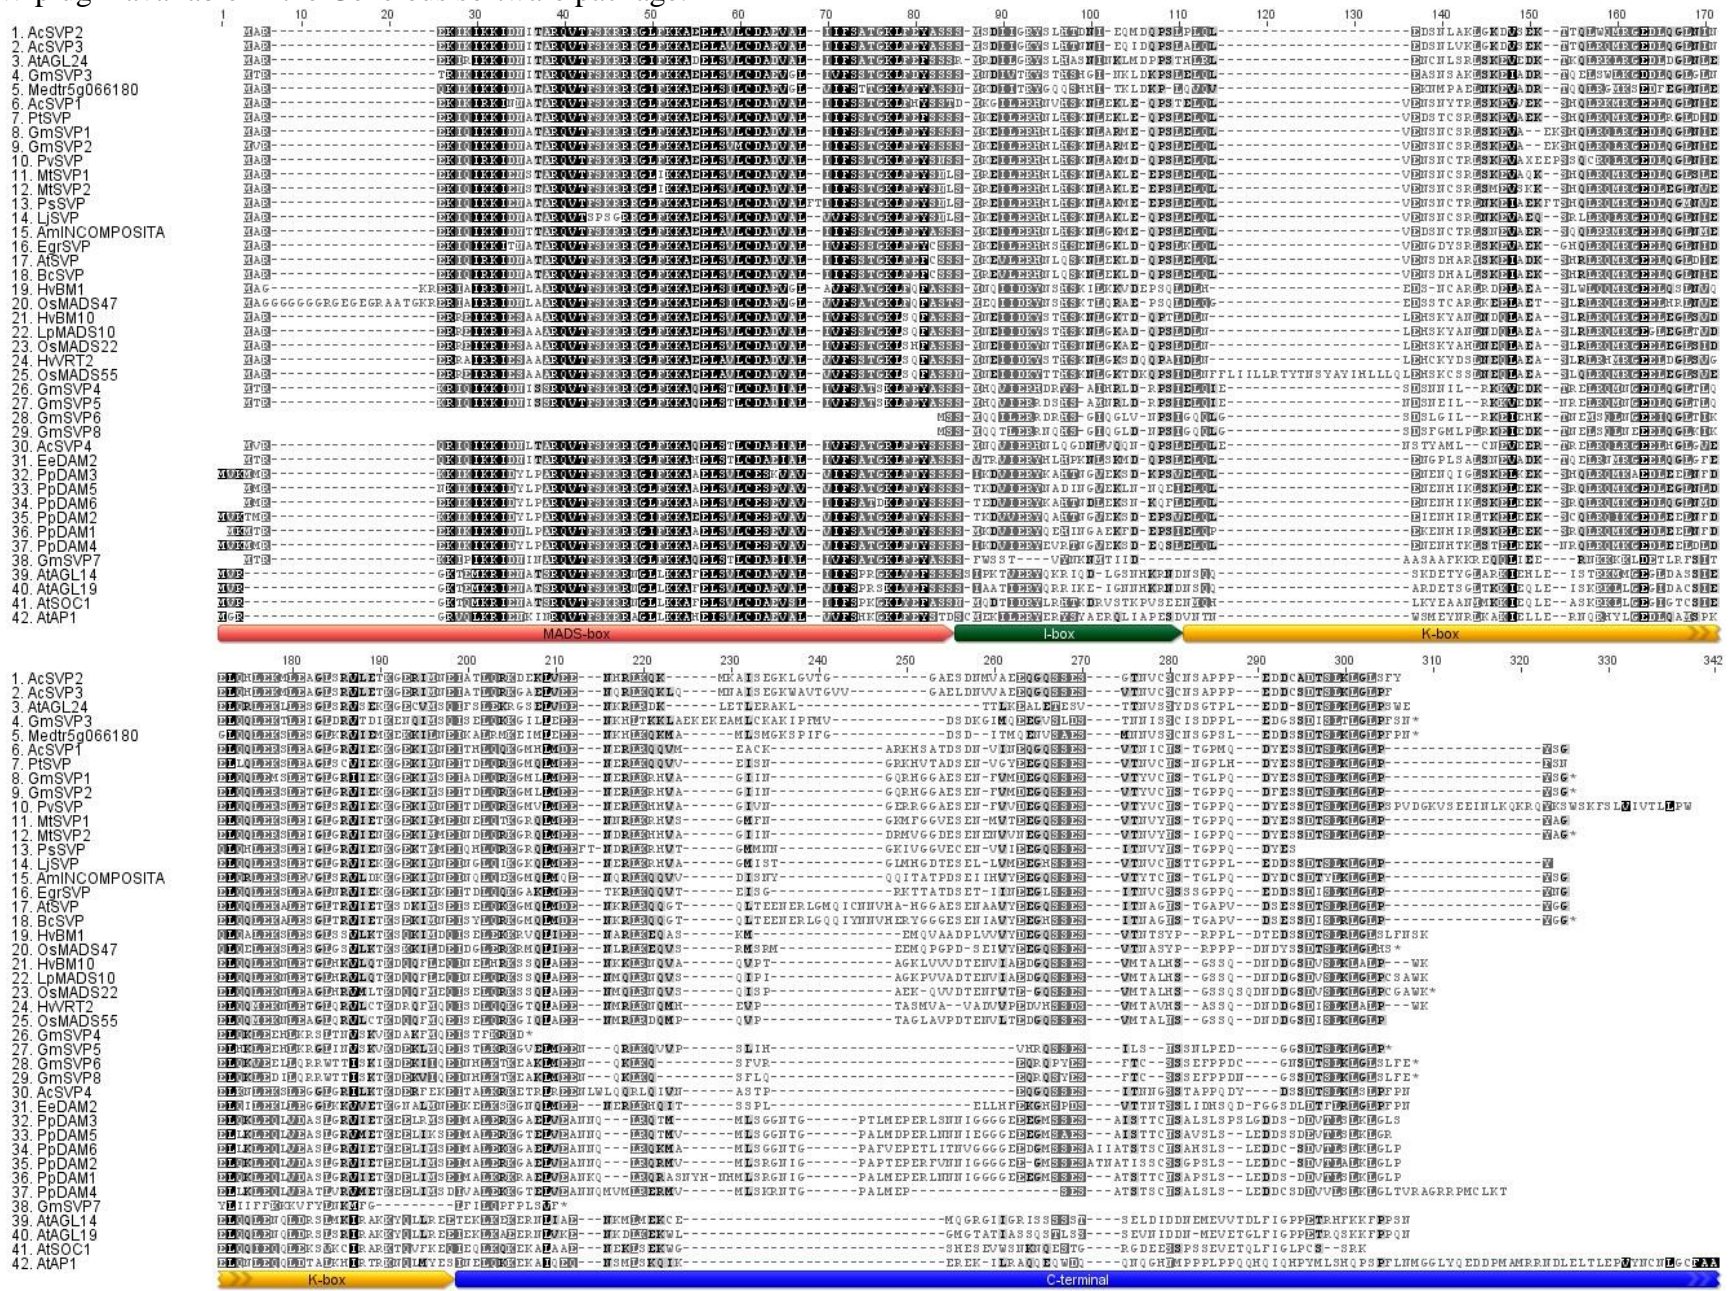

**Fig. S2.** Effect of vernalization on the transcript levels of *MtSVP1* and *MtSVP2*. (A) Schematic diagram of *Medicago* developmental stages prior to, during and after vernalization and the position of leaves that were sampled and used in gene expression analyses. Imbibed seeds of *Medicago* wild type Jester were grown in LD at 21 °C until 2-leaf stage in which the plants had a monofoliate (M) and fully expanded first trifoliate (L1) leaves (Time 0; approximately 11-day old). The plants were then vernalized for 14 days in SDs (16h dark/ 8h light) at 4 °C (14VT0=stands for 14 days in the cold, 0 day in the warm) and then returned to warm temperature (21 °C) under LD conditions for 2 (14VT2), 7 (14VT7), and 14 (14VT14) days. RNA samples were extracted from apical buds and leaves (encircled) at each stage. L1= Leaf 1, L3= Leaf 3, L6= Leaf 6. (B-C) Relative expression levels of *MtSVP1* (B) and *MtSVP2* (C) in leaves and dissected uppermost apical buds. Gene expression was determined using qRT-PCR and the data are shown as the mean  $\pm$  SE of three biological replicates, which were normalized to *PDF2*. The data is presented relative to the highest value in both tissues for each gene. Samples were harvested at ZT2. The shaded area indicates the time point after prolonged cold exposure for 14 days.

**A**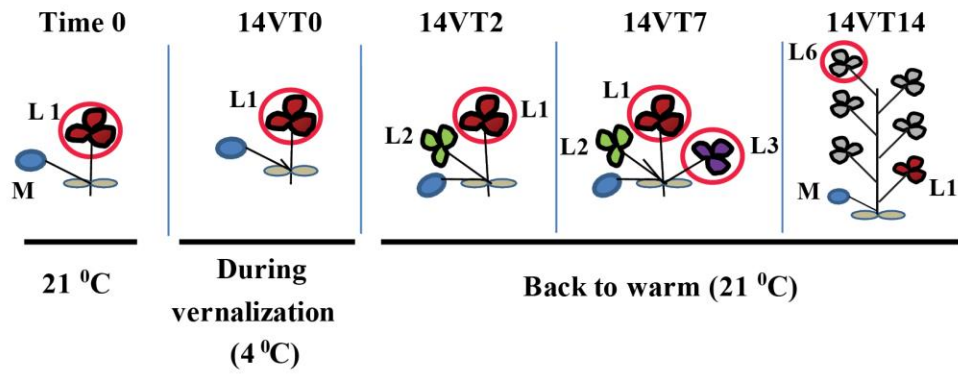**B***MtSVP1*

Leaves

Apical buds

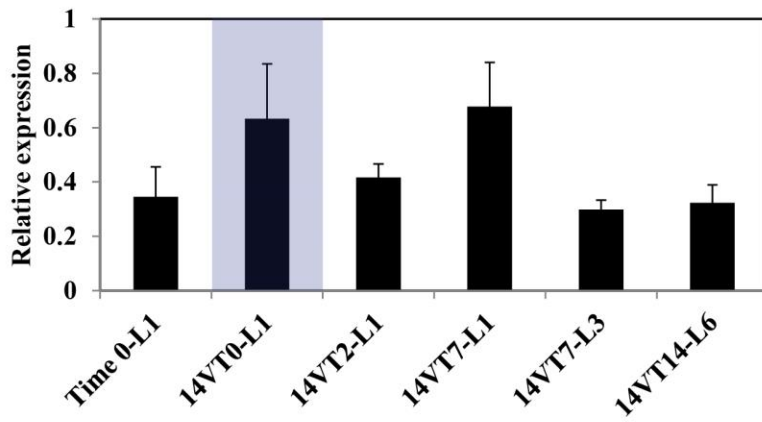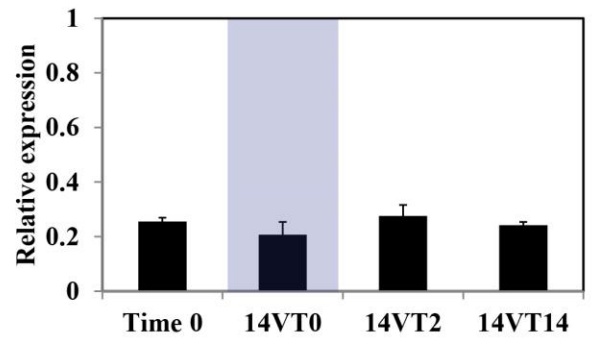**C***MtSVP2*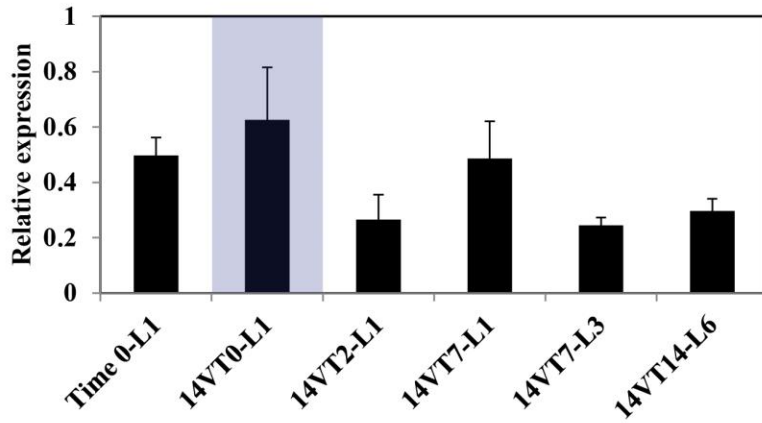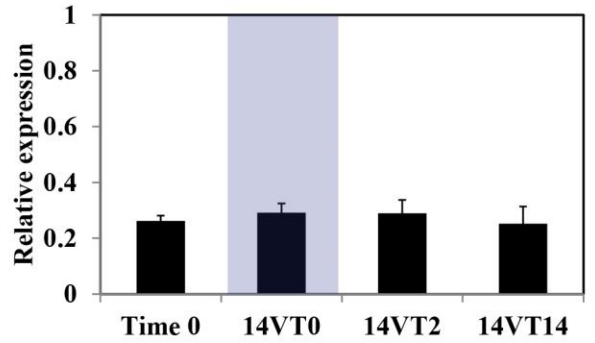

**Table S1.** List of oligonucleotide primers (5' to 3') used in this study.

|                | <b>Forward primer</b>         | <b>Reverse primer</b>        | <b>Use</b> |
|----------------|-------------------------------|------------------------------|------------|
| MtSVP1         | GGATATGGCTCGTGAGAAGATTCA      | GGTTTAACCCTCGCACAAATCTAC     | Cloning    |
| MtSVP2         | GGGATATGGCTCGTGAGAAGATTCA     | TTCAGCCGGCATATGGTAGTCCCAAC   | Cloning    |
| MtSVP1         | TGGAGGAGTTGAATCTGAGAACATGG    | CAGCCAGCATATGGAAGCCCCAA      | qRT-PCR    |
| MtSVP2         | GCGGGCATCATTAAACGACAGAATGGTTG | GTCCCAACTTGAGCGATGTATCCGAACT | qRT-PCR    |
| PDF2           | GTGTTTTGCTTCCGCCGTT           | CCAAATCTTGCTCCCTCATCTG       | qRT-PCR    |
| MtPIM          | GCACAATGGGAGCACCCAAACCA       | GCTTCCTCACGGTAATTGCCACCCA    | qRT-PCR    |
| TUBULIN        | CTCCTAGCTTTGGTGACTTGAACC      | TTCCGGAGATCAGAGTTGAGTT       | qRT-PCR    |
| MtSVP2_NF11029 | AGGTCACCTTGAAATTGGGTTGGGCCGT  | GTCGGTCGTTCTCTTCCATCAATTGCC  | genotyping |
| MtSVP2_NF13617 | GGTTGCGGGCATCATTAAACGACA      | TCAGCCGGCATATGGTAGTCTGC      | genotyping |
| Tnt1-F         | ACAGTGCTACCTCCTCTGGATG        |                              | genotyping |

**Table S2.** Flowering time of T2 Arabidopsis transgenic plants from the overexpression of *MtSVP1* and *MtSVP2* in WT Col under LD conditions and classification of floral phenotypes. (A) The flowering time was measured as the total number of rosette and cauline leaves at flowering. The class of floral phenotype is based on the severity of floral defects as explained in (B). (B) The floral organ morphologies observed in transgenic plants transformed with *35S:MtSVP1* and *35S:MtSVP2* were classified into four categories: (1) same as WT; (2) weak = longer pedicels than WT, splayed arrangement of floral organs and lack of sepal abscission; (3) moderate = the weak phenotype including 5-7 anthers and 4-6 petals (†) and deformed siliques; and (4) extreme = up to three times increase on pedicel length compared with WT, more pronounced flower splaying, lack of sepal abscission, 6 sepals, up to 8 anthers and 9 petals (‡), sepaloid (green) petals, and enlarged and elongated carpels. <sup>a</sup>Numbers in this row represent increase in pedicel length relative to WT. A WT plant has 4 sepals, 4 petals, 6 stamens and 2 fused carpels.

**A**

|                          | Line  | Flowering time (mean ± SE) | No. of transgenic T2 plants | Class of floral phenotype |
|--------------------------|-------|----------------------------|-----------------------------|---------------------------|
| <i>35S:MtSVP1</i> in Col | MJ244 | 15.1 ± 0.4                 | 19                          | moderate                  |
|                          | MJ247 | 17.2 ± 0.6                 | 18                          | moderate                  |
|                          | MJ257 | 18.7 ± 0.6                 | 17                          | extreme                   |
|                          | MJ258 | 12.3 ± 0.3                 | 18                          | same as wild type         |
| WT Col                   |       | 12.4 ± 0.4                 |                             |                           |
| <i>35S:MtSVP2</i> in Col | MJ291 | 14.5 ± 0.6                 | 17                          | extreme                   |
|                          | MJ292 | 13.3 ± 0.4                 | 15                          | moderate                  |
|                          | MJ293 | 14.7 ± 0.5                 | 15                          | extreme                   |
|                          | MJ294 | 12.5 ± 0.4                 | 15                          | same as wild type         |
|                          | MJ295 | 12.1 ± 0.4                 | 18                          | same as wild type         |
| WT Col                   |       | 10.6 ± 0.3                 |                             |                           |

**B**

|                                       | WT | Weak | Moderate | Extreme |
|---------------------------------------|----|------|----------|---------|
| Increased pedicel length <sup>a</sup> |    | 2X   | 2X       | 2-3X    |
| Flower splaying                       |    |      |          |         |
| Lack of sepal abscission              |    |      |          |         |
| Change in anther and petal number     |    |      | †        | ‡       |
| Deformed siliques                     |    |      |          |         |
| Sepaloid (green) petals               |    |      |          |         |

Intensity of phenotype None  Strong
